# Supplementary material for: Inkjet printing technology for increasing the I/O density of 3D TSV interposers
Source: PubMed Central journal article supplement (PMC6445024; doi:10.1038/micronano.2017.2), 2017-04-10
Supplement: micronano20172-s1.pdf [file micronano20172-s1.pdf]

## Supplementary file

# Inkjet printing technology for increasing the I/O density of 3D TSV interposers

Behnam Khorramdel<sup>1</sup>, Jessica Liljeholm<sup>2,3</sup>, Mika-Matti Laurila<sup>1</sup>, Toni Lammi<sup>1</sup>, Gustaf Mårtensson<sup>4,5</sup>, Thorbjörn Ebefors<sup>2</sup>, Frank Niklaus<sup>3</sup> and Matti Mäntysalo<sup>1</sup>

*Microsystems & Nanoengineering* (2017) **3**, 17002; doi:10.1038/micronano.2017.2; Published online: 10 April 2017

**Table S1** Printing parameters for printing fresh InkOrmo polymer with the Dimatix

|                                           |      |
|-------------------------------------------|------|
| Cartridge setting                         |      |
| Jetting voltage (Volts)                   | 27.3 |
| Cartridge temperature (in C)              | 30   |
| Substrate temperature (in C)              | 28   |
| Meniscus vacuum (inches H <sub>2</sub> O) | 4.0  |
| Cartridge print height (mm)               | 0.8  |

**Table S2** Printing parameters used for printing the UBM pads with SIJ

|                                |                          |
|--------------------------------|--------------------------|
| Waveform                       | Sine wave                |
| Amplitude [V]                  | 453                      |
| Bias (DC) [V]                  | 0 (on top of dielectric) |
| ON speed [mm s <sup>-1</sup> ] | 0.30                     |
| Frequency [Hz]                 | 70                       |
| Spiral pitch [μm]              | 15                       |
| Number of layers               | ~60                      |

<sup>1</sup>Department of Electronics and Communications Engineering, Tampere University of Technology, Korkeakoulunkatu 3, Tampere 33720, Finland; <sup>2</sup>Silex Microsystems AB, Bruttovägen 1, Järfälla/Stockholm SE-175 26, Sweden; <sup>3</sup>KTH Royal Institute of Technology, Micro and Nanosystem, Osquidas väg 10, 10444 Stockholm, Sweden; <sup>4</sup>EMSL, Chalmers University of Technology, Kemivägen 9, 41296 Göteborg, Sweden and <sup>5</sup>Mycronic AB, Nytorpsvägen 9, 18303 Täby, Sweden

Correspondence: Behnam Khorramdel (behn.khorramdel@tut.fi) or Frank Niklaus (frank.niklaus@ee.kth.se) or Matti Mäntysalo (matti.mantysalo@tut.fi)
